# Supplementary material for: Autophagy and senescence in cancer-associated fibroblasts metabolically supports tumor growth and metastasis via glycolysis and ketone production
Source: PubMed Central journal article supplement — Cell Cycle. 2012 Jun 15;11(12):2285–302. doi: 10.4161/cc.20718 (PMC3383590; doi:10.4161/cc.20718), 2012-06-15
Supplement: cc-11-2285-s01.pdf [file cc-11-2285-s01.pdf]

## **Supplemental Material to:**

**Claudia Capparelli, Carmela Guido, Diana Whitaker-Menezes, Gloria Bonuccelli, Renee Balliet, Timothy Pestell, Allison F. Goldberg, Richard G. Pestell, Anthony Howell, Sharon Sneddon, Ruth Birbe, Aristotelis Tsirigos, Ubaldo Martinez-Outschoorn, Federica Sotgia and Michael P. Lisanti**

**Autophagy and senescence in cancer-associated fibroblasts metabolically supports tumor growth and metastasis, via glycolysis and ketone production**

**2012; 11(12)**

**<http://dx.doi.org/10.4161/cc.20718>**

**<http://www.landesbioscience.com/journals/cc/article/20718>**

**Supplemental Table 1.**

**Transcriptional Over-Expression of Senescence-Associated Genes in Tumor Stroma Isolated from Breast Cancer Patients.**

| Symbol                                               | Gene Description                                            | Tumor-Stroma    | Recurrence-Stroma | Metastasis-Stroma |
|------------------------------------------------------|-------------------------------------------------------------|-----------------|-------------------|-------------------|
| <b><u>Senescence Pathway</u></b>                     |                                                             |                 |                   |                   |
| Atm                                                  | ataxia telangiectasia mutated homolog (human)               | 3.79E-04        | 3.18E-02          | 2.84E-02          |
| Bmi1                                                 | Bmi1 polycomb ring finger oncogene                          | 1.49E-24        |                   |                   |
| <b>Ccnd1</b>                                         | <b>cyclin D1</b>                                            | <b>1.42E-14</b> | <b>3.67E-02</b>   | <b>4.21E-02</b>   |
| <b>Cdkn2a</b>                                        | <b>cyclin-dependent kinase inhibitor 2A (p16 INK4A)</b>     | <b>5.71E-29</b> |                   |                   |
| <b>Cdkn1a</b>                                        | <b>cyclin-dependent kinase inhibitor 1A (p21 WAF1/CIP1)</b> | <b>3.73E-19</b> |                   |                   |
| Ciz1                                                 | Cdkn1a interacting zinc finger protein 1                    | 2.13E-02        | 4.59E-03          |                   |
| Chek1                                                | checkpoint kinase 1 homolog (S. pombe)                      |                 | 3.71E-03          |                   |
| Col3a1                                               | collagen, type III, alpha 1                                 | 3.32E-27        | 8.00E-05          |                   |
| Col1a1                                               | collagen, type I, alpha 1                                   | 3.20E-17        | 2.46E-03          |                   |
| E2f1                                                 | E2F transcription factor 1                                  |                 | 5.87E-04          |                   |
| Ets1                                                 | E26 avian leukemia oncogene 1, 5' domain                    | 2.17E-15        | 7.54E-05          |                   |
| Ets2                                                 | E26 avian leukemia oncogene 2, 3' domain                    | 3.22E-09        | 4.05E-02          |                   |
| Mdm2                                                 | transformed mouse 3T3 cell double minute 2                  | 2.27E-14        | 8.68E-03          |                   |
| Rb1                                                  | retinoblastoma 1                                            | 1.46E-16        | 2.30E-03          |                   |
| Twist1                                               | twist homolog 1 (Drosophila)                                | 8.64E-08        | 2.82E-02          |                   |
| <b><u>Senescence Initiators &amp; Responders</u></b> |                                                             |                 |                   |                   |
| Abi1                                                 | c-abl oncogene 1, receptor tyrosine kinase                  | 1.70E-30        | 3.86E-02          | 1.96E-02          |
| Aldh1a3                                              | aldehyde dehydrogenase family 1, subfamily A3               | 2.03E-09        |                   |                   |
| Akt3                                                 | thymoma viral proto-oncogene 3                              | 2.18E-13        |                   |                   |
| Calr3                                                | calreticulin 3                                              | 6.13E-12        |                   |                   |
| Calr                                                 | calreticulin                                                |                 | 3.60E-02          |                   |

|               |                                                                  |                 |          |                 |
|---------------|------------------------------------------------------------------|-----------------|----------|-----------------|
| Ccnb1         | cyclin B1                                                        | 1.53E-04        | 8.59E-03 |                 |
| <b>Cdkn2b</b> | <b>cyclin-dependent kinase inhibitor 2B (p15, inhibits CDK4)</b> | <b>4.47E-07</b> |          | <b>9.38E-03</b> |
| <b>Cdkn2c</b> | <b>cyclin-dependent kinase inhibitor 2C (p18, inhibits CDK4)</b> | <b>1.04E-05</b> |          |                 |
| <b>Cdkn1b</b> | <b>cyclin-dependent kinase inhibitor 1B (p27 KIP1)</b>           |                 |          | <b>4.82E-02</b> |
| <b>Cdkn3</b>  | <b>cyclin-dependent kinase inhibitor 3</b>                       |                 |          | <b>4.12E-02</b> |
| Pak2          | p21 (Cdkn1a)-activated kinase 2                                  | 2.46E-28        |          |                 |
| Pak3          | p21 (Cdkn1a)-activated kinase 3                                  | 3.04E-04        | 4.21E-02 |                 |
| Pak4          | p21 (Cdkn1a)-activated kinase 4                                  | 2.50E-21        | 5.49E-03 |                 |
| Pak7          | p21 (Cdkn1a)-activated kinase 7                                  | 3.12E-03        |          |                 |
| Cdc25c        | cell division cycle 25 homolog C (S. pombe)                      |                 |          | 2.64E-02        |
| Creg2         | cellular repressor of E1A-stimulated genes 2                     | 9.29E-18        |          |                 |
| Egr1          | early growth response 1                                          | 2.01E-06        |          |                 |
| Fn1           | fibronectin 1                                                    | 8.19E-13        | 6.23E-04 |                 |
| <b>Glb1</b>   | <b>galactosidase, beta 1</b>                                     | <b>1.91E-23</b> |          |                 |
| Ifng          | interferon gamma                                                 | 5.76E-04        |          |                 |
| Irf5          | interferon regulatory factor 5                                   | 1.93E-17        |          |                 |
| Irf7          | interferon regulatory factor 7                                   | 6.99E-17        | 4.58E-02 | 2.85E-02        |
| Igf1r         | insulin-like growth factor I receptor                            | 2.20E-17        | 4.95E-04 |                 |
| Igfbp1        | insulin-like growth factor binding protein 1                     |                 |          | 2.84E-02        |
| Igfbp2        | insulin-like growth factor binding protein 2                     |                 | 1.86E-03 | 1.12E-03        |
| Igfbp5        | insulin-like growth factor binding protein 5                     | 6.27E-15        | 5.54E-03 | 4.99E-02        |
| Igfbp7        | insulin-like growth factor binding protein 7                     | 5.46E-13        |          |                 |
| Igfbpl1       | insulin-like growth factor binding protein-like 1                | 1.54E-17        | 9.78E-04 |                 |
| Igf2bp1       | insulin-like growth factor 2 mRNA binding protein 1              |                 |          | 4.70E-03        |
| Map2k3        | mitogen-activated protein kinase kinase 3                        | 1.24E-17        |          |                 |
| Map2k6        | mitogen-activated protein kinase kinase 6                        | 9.14E-10        |          |                 |
| Mapk14        | mitogen-activated protein kinase 14                              | 2.32E-02        |          |                 |
| Myc           | myelocytomatosis oncogene                                        | 3.16E-13        | 1.32E-04 |                 |
| Mycn          | myelocytomatosis oncogene, neuroblastoma derived                 | 1.55E-02        | 1.35E-02 | 4.01E-03        |
| Mycbp         | c-myc binding protein                                            | 3.67E-02        |          | 3.67E-02        |
| Mycbp2        | c-myc binding protein 2                                          |                 | 4.16E-02 |                 |
| Ndr3          | N-myc downstream regulated gene 3                                | 4.53E-02        |          | 4.53E-02        |

|             |                                                                   |                 |                 |                 |
|-------------|-------------------------------------------------------------------|-----------------|-----------------|-----------------|
| Ndrp4       | N-myc downstream regulated gene 4                                 |                 | 4.89E-02        |                 |
| Nfkb1       | NF kappa light polypeptide gene enhancer in B-cells 1, p105       | 1.40E-05        |                 |                 |
| Nox4        | NADPH oxidase 4                                                   | 2.75E-31        |                 |                 |
| Prkcd       | protein kinase C, delta                                           | 5.67E-12        | 6.24E-04        |                 |
| Pten        | phosphatase and tensin homolog                                    | 2.87E-06        |                 |                 |
| Pink1       | PTEN induced putative kinase 1                                    | 5.28E-09        |                 | 4.60E-02        |
| Plau        | plasminogen activator, urokinase                                  | 3.64E-38        | 2.42E-03        |                 |
| Serpib2     | serine (or cysteine) peptidase inhibitor cladeB member2 (PAI-2)   |                 |                 | 4.27E-02        |
| Sirt7       | sirtuin 7 (silent mating type information regulation 2 homolog) 7 |                 |                 | 2.42E-02        |
| Sirt5       | sirtuin 5 (silent mating type information regulation 2 homolog) 5 | 4.19E-23        |                 |                 |
| Sirt6       | sirtuin 6 (silent mating type information regulation 2 homolog) 6 | 2.31E-15        |                 |                 |
| Sirt3       | sirtuin 3 (silent mating type information regulation 2 homolog) 3 | 1.25E-14        |                 |                 |
| Sirt2       | sirtuin 2 (silent mating type information regulation 2 homolog) 2 | 4.12E-08        | 4.51E-04        |                 |
| Sod2        | superoxide dismutase 2, mitochondrial                             | 1.45E-11        |                 |                 |
| Sod3        | superoxide dismutase 3, extracellular                             | 1.33E-04        |                 |                 |
| Sparc       | secreted acidic cysteine rich glycoprotein                        | 1.49E-35        |                 |                 |
| Tbx3        | T-box 3                                                           | 1.03E-02        |                 |                 |
| <b>Tert</b> | <b>telomerase reverse transcriptase</b>                           | <b>1.34E-11</b> | <b>1.23E-02</b> | <b>2.17E-02</b> |
| Terf1       | telomeric repeat binding factor 1                                 |                 |                 | 4.49E-02        |
| Terf2       | telomeric repeat binding factor 2                                 | 3.56E-08        | 1.63E-02        |                 |
| Tep1        | telomerase associated protein 1                                   | 2.21E-07        | 5.05E-05        |                 |
| Tinf2       | Terf1 (TRF1)-interacting nuclear factor 2                         | 8.40E-06        |                 |                 |
| Rtel1       | regulator of telomere elongation helicase 1                       | 6.03E-06        |                 |                 |
| Tgfb3       | transforming growth factor, beta 3                                | 2.16E-23        |                 |                 |
| Tgfr1       | transforming growth factor, beta receptor I                       | 1.56E-20        |                 |                 |
| Tgfr2       | transforming growth factor, beta receptor II                      | 3.22E-08        |                 |                 |
| Tgfi        | transforming growth factor, beta induced                          | 4.22E-12        | 1.14E-02        |                 |
| Smad1       | MAD homolog 1 (Drosophila)                                        | 2.47E-12        |                 |                 |
| Smad2       | MAD homolog 2 (Drosophila)                                        | 4.94E-18        |                 | 3.01E-03        |

|        |                                             |          |          |
|--------|---------------------------------------------|----------|----------|
| Smad4  | MAD homolog 4 (Drosophila)                  | 1.16E-12 |          |
| Smad5  | MAD homolog 5 (Drosophila)                  | 4.17E-10 |          |
| Smad9  | MAD homolog 9 (Drosophila)                  | 4.49E-10 | 7.64E-03 |
| Smurf1 | SMAD specific E3 ubiquitin protein ligase 1 | 1.16E-16 | 4.24E-02 |
| Thbs1  | thrombospondin 1                            | 6.83E-06 | 6.87E-03 |

---

**Data Mining from the Morag Park Data Set: Finak et al., 2008, Nature Medicine, 14 (5): 518-27.**

**Note that six Cyclin-dependent kinase (CDK) Inhibitors, SA-beta-galactosidase (Glb1), cyclin D1, and telomerase (Tert) are all highlighted in BOLD. P-values are as shown.**
